# Supplementary material for: Relationship of T2-Weighted MRI Myocardial Hyperintensity and the Ischemic Area-At-Risk
Source: PubMed Central journal article supplement — Circ Res. 2015 Jul 16;117(3):254–65. doi: 10.1161/CIRCRESAHA.117.305771 (PMC4503326; doi:10.1161/circresaha.117.305771), 2015-07-16
Supplement: res-117-254-s001.pdf [file res-117-254-s001.pdf]

**Relationship of T2-weighted MRI myocardial hyperintensity and the ischemic area-at-risk**

**Online Supplement Figure**

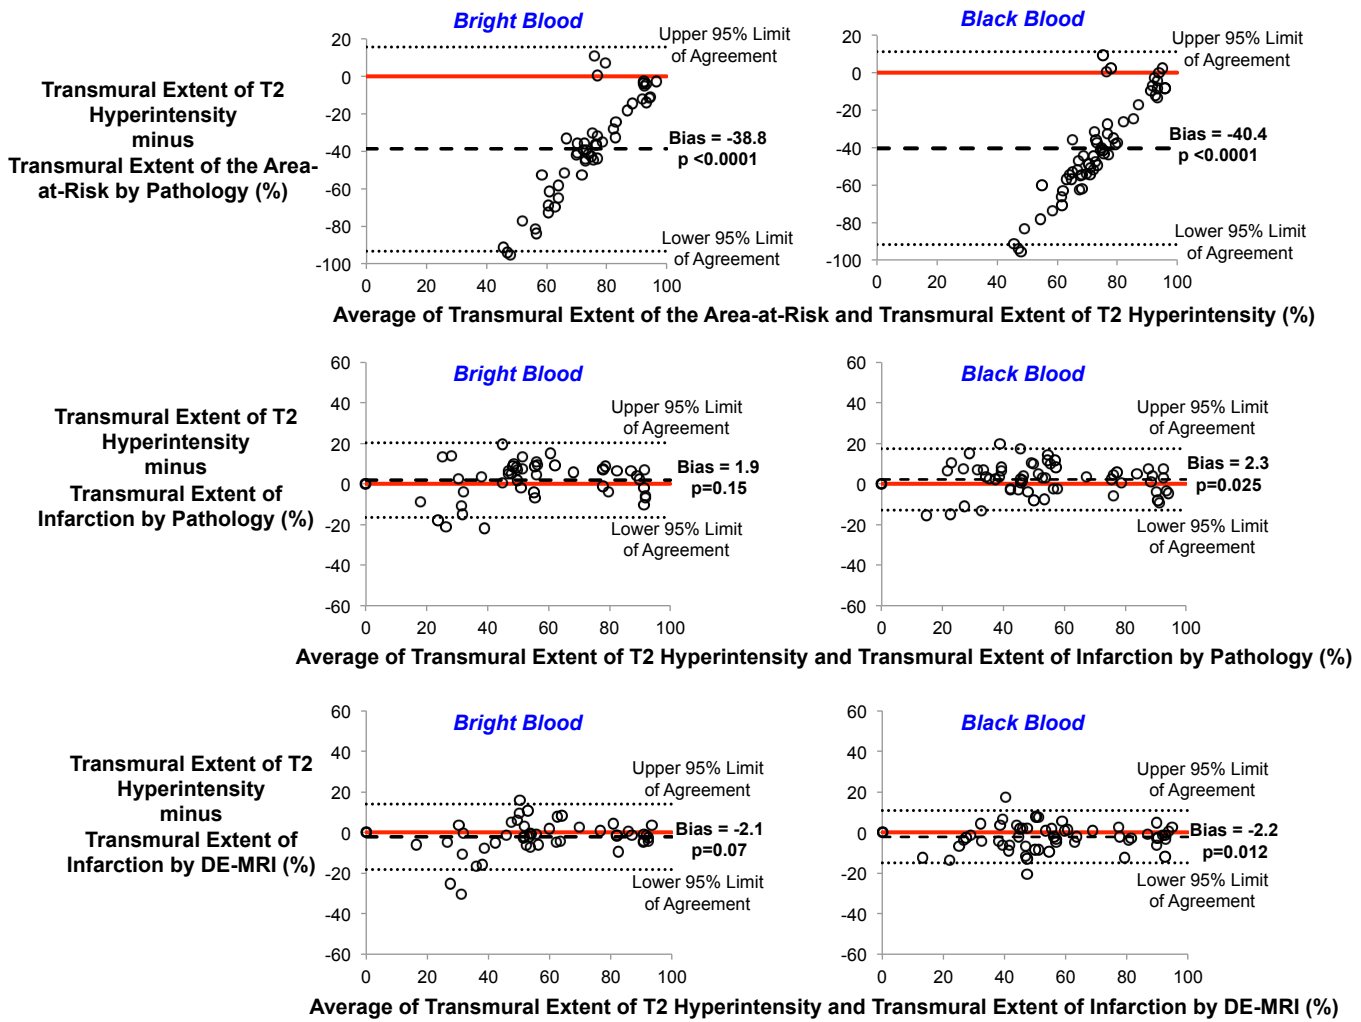

**Figure Caption:** Bland-Altman analyses demonstrate that there is a large bias between the transmural extent of T2-hyperintensity and the area-at-risk (bright-blood: -38.8%; black-blood: -40.4%), whereas the bias is far smaller when T2-weighted-MRI is compared against infarction by pathology (bright-blood: 1.9%; black-blood: 2.3%) or *in-vivo* delayed-enhancement-MRI (bright-blood: -2.1%; black-blood: -2.2%).

**Online Table.****Relationship between transmural extent of T2-hyperintensity and infarction by Delayed-Enhancement-MRI**

| <b>Abnormal Signal Threshold</b>             |                                                      | <b>Black Blood</b> |         | <b>Bright Blood</b> |         |
|----------------------------------------------|------------------------------------------------------|--------------------|---------|---------------------|---------|
| <i>T2-Weighted-MRI</i><br>(No. of SD>remote) | <i>Delayed-Enhancement-MRI</i><br>(No. of SD>remote) | r                  | p-value | r                   | p-value |
| 2                                            | 2                                                    | 0.97               | <0.0001 | 0.95                | <0.0001 |
|                                              | 3                                                    | 0.94               | <0.0001 | 0.93                | <0.0001 |
|                                              | 4                                                    | 0.91               | <0.0001 | 0.91                | <0.0001 |
|                                              | 5                                                    | 0.88               | <0.0001 | 0.81                | <0.0001 |
| 3                                            | 2                                                    | 0.91               | <0.0001 | 0.89                | <0.0001 |
|                                              | 3                                                    | 0.89               | <0.0001 | 0.85                | <0.0001 |
|                                              | 4                                                    | 0.87               | <0.0001 | 0.88                | <0.0001 |
|                                              | 5                                                    | 0.85               | <0.0001 | 0.79                | <0.0001 |
